# Supplementary material for: Mediterranean diet and time-restricted eating as a cardiac rehabilitation approach for patients with coronary heart disease and pre-diabetes: the DIABEPIC-1 protocol of a feasibility trial
Source: PubMed Central journal article supplement — BMJ Open. 2023 Oct 17;13(10):e073763. doi: 10.1136/bmjopen-2023-073763 (PMC10582969; doi:10.1136/bmjopen-2023-073763), 2023-10-17
Supplement: bmjopen-2023-073763supp001.pdf [file bmjopen-2023-073763supp001.pdf]

**Supplementary Table 1.** DIABEPIC1 schedule of enrolment and assessments.

|                                      | <b>Cardiovascular Prevention and Rehabilitation Center of the Montreal Heart Institute (Centre ÉPIC)</b> |                |                |                               |                                          |                |                |                                           |                |                |
|--------------------------------------|----------------------------------------------------------------------------------------------------------|----------------|----------------|-------------------------------|------------------------------------------|----------------|----------------|-------------------------------------------|----------------|----------------|
|                                      | <b>Pre-intervention Evaluations (T0)</b>                                                                 |                |                |                               | <b>Mid-intervention evaluations (T3)</b> |                |                | <b>Post-intervention evaluations (T6)</b> |                |                |
|                                      |                                                                                                          | <b>Visit 1</b> | <b>Visit 2</b> | <b>Visit 3<br/>(optional)</b> | <b>Visit 1</b>                           | <b>Visit 2</b> | <b>Visit 3</b> | <b>Visit 1</b>                            | <b>Visit 2</b> | <b>Visit 3</b> |
| <b>Duration (6 months)</b>           | 90 min                                                                                                   | 120 min        | 60 min         | 90 min                        | 60 min                                   | 120 min        | 60 min         | 60 min                                    | 120 min        | 60 / 150 min   |
| <b>Procedures</b>                    |                                                                                                          |                |                |                               |                                          |                |                |                                           |                |                |
| Explanation of the project           | X                                                                                                        |                |                |                               |                                          |                |                |                                           |                |                |
| Consent to participate               | X                                                                                                        |                |                |                               |                                          |                |                |                                           |                |                |
| Medical visit                        | X                                                                                                        |                |                |                               | X                                        |                |                | X                                         |                |                |
| Maximum effort test                  | X                                                                                                        |                |                |                               | X                                        |                |                | X                                         |                |                |
| Blood test                           |                                                                                                          | X              |                |                               |                                          | X              |                |                                           | X              |                |
| Body composition                     |                                                                                                          | X              |                |                               |                                          | X              |                |                                           | X              |                |
| Food Diary<br>(appl. <i>Keenoa</i> ) |                                                                                                          |                | X              |                               |                                          |                | X              |                                           |                | X              |
| Cognitive tests                      |                                                                                                          | X              |                |                               |                                          | X              |                |                                           | X              |                |
| Educational intervention             |                                                                                                          |                | X              |                               |                                          |                | X              |                                           |                | X              |
| Questionnaires                       | X                                                                                                        |                |                |                               | X                                        |                |                | X                                         |                |                |
| Vascular measurements<br>(optional)  |                                                                                                          |                |                | X                             |                                          |                |                |                                           |                | X              |
